# Supplementary material for: Septum resection in women with a septate uterus: a cohort study
Source: PubMed Central journal article supplement — Hum Reprod. 2020 Apr 30;35(7):1578–88. doi: 10.1093/humrep/dez284 (PMC7368397; doi:10.1093/humrep/dez284), 2020-04-30
Supplement: dez284_supplementary_data.pdf [file dez284_supplementary_data.pdf]

**Supplementary Table S1 Reproductive outcome of all women with a complete septate uterus.**

|                                          | Septum resection (n = 27) | Expectant management (n = 14) | OR/HR (95% CI)       |
|------------------------------------------|---------------------------|-------------------------------|----------------------|
| Conception                               |                           |                               | HR 0.32 (0.10–1.09)  |
| Yes                                      | 22 (81.5%)                | 12 (85.7%)                    |                      |
| No                                       | 5 (18.5%)                 | 2 (14.3%)                     |                      |
| Live birth                               |                           |                               | HR 0.36 (0.11–1.20)  |
| Yes                                      | 17 (63%)                  | 12 (85.7%)                    |                      |
| No                                       | 10 (37%)                  | 2 (14.3%)                     |                      |
| Ongoing pregnancy                        |                           |                               | HR 0.26 (0.07–0.91)  |
| Yes                                      | 19 (70.4%)                | 12 (85.7%)                    |                      |
| No                                       | 8 (29.6%)                 | 2 (14.3%)                     |                      |
| Pregnancy loss (% of conception)         |                           |                               | OR 3.90 (0.43–35.78) |
| Yes                                      | 11 (50%)                  | 6 (50%)                       |                      |
| No                                       | 11 (50%)                  | 6 (50%)                       |                      |
| Preterm birth (% of ongoing pregnancy)   |                           |                               | OR 1.99 (0.15–26.98) |
| Yes                                      | 9 (47.4%)                 | 2 (16.7%)                     |                      |
| No                                       | 10 (52.6%)                | 10 (83.3%)                    |                      |
| Unknown                                  |                           |                               |                      |
| Malpresentation (% of ongoing pregnancy) |                           |                               | OR 0.08 (0.00–2.58)  |
| Yes                                      | 4 (21.1%)                 | 6 (50%)                       |                      |
| No                                       | 15 (78.9%)                | 6 (50%)                       |                      |
| Unknown                                  |                           |                               |                      |

OR = odds rate, HR = hazard rate, CI = confidence interval.

Only the first live birth or first ongoing pregnancy per woman was included.

All outcomes adjusted were for age, BMI, smoking, ethnicity, country, classification, diagnostic procedure, subfertility, pregnancy loss, preterm birth and previous live birth.
